# Supplementary material for: Iron Deficiency Aggravates Hepatic Inflammation via Endoplasmic Reticulum Stress-Driven NF-κB Pathway Activation in Suckling Piglets
Source: Research Square preprint supplement (doi:10.21203/rs.3.rs-7787366/v1), 2025-10-27
Supplement: Supplementary file 1 [file 48d2c1e4a9d05ce6793996fe.docx]

**Supplementary Table S1.** Ingredients composition of iron-deficient milk powder for Suckling piglets.

| Ingredient | Content (g/kg) |
| --- | --- |
| Skim milk powder | 160 |
| Whey powder | 426 |
| Whey protein concentrate | 190 |
| Soy lecithin powder | 150 |
| Compound vitamins | 3 |
| Corn starch | 18.3 |
| Dicalcium phosphate | 40 |
| Sodium selenite | 0.011827 |
| Manganese sulfate | 0.02375 |
| Copper sulfate | 0.016 |
| Zinc sulfate | 0.05246 |
| Calcium iodate | 0.027 |
| Magnesium sulfate | 0.137 |
| Sodium chloride | 10 |
| Potassium chloride | 2.86 |

Note: Each kilogram of milk powder contains 8 g of calcium, 6.6 g of phosphorus, 54 μg of selenium, 7.6 mg of manganese, 4 mg of copper, 18.1 mg of zinc, 0.179 mg of iodine, 20.5 mg of magnesium, 1.5 g of potassium, and 12.8 mg of iron.

**Supplementary Table S2.** Milk feeding schedule for newborn piglets.

| Age Period (days) | Feeding Volume per Meal (mL) | Daily Feeding Frequency |
| --- | --- | --- |
| 0-2 |  |  |
| 2-4 | 10 | 12 |
| 5-7 | 20 | 12 |
| 8-10 | 30 | 10 |
| 11-13 | 40 | 10 |
| 14-16 | 60 | 8 |
| 17-19 | 70 | 8 |
| 20-21 | 70 | 8 |

Note: The milk replacer was prepared fresh immediately before each feeding by dissolving 206 g of solid milk replacer powder in 1 L of warm deionized water (40 °C). From days 2 to 4, piglets were fed 10 mL per feeding at 2-h intervals, for a total of 6–8 feedings per day. Beginning on day 5, the volume per feed was increased by 10 mL every 2–3 days until a total daily volume of 560 mL was reached.

**Supplementary Table S3.** Primer sequences and accession numbers of genes used in

qRT-PCR(pig).

| Gene（pig） | Primer sequences (5′-3′) | Accession numbes |
| --- | --- | --- |
| *Gapdh* | CGTCCCTGAGACACGATGGT | AF017079.1 |
| GCCTTGACTGTGCCGTGGAAT |
| *Sod* | AGATTCTGTGATCGCCCTCT | NM_001190422.1 |
| TCCAGCATTTCCCGTCTTTG |
| *Cat* | CGTTCTGTAAGGCTAGTCGG | XM_021081498.1 |
| AGGAATTCTCTCCCGGTCAA |
| *Gpx* | GGGAGATCCTGAATTGCCTC | NM_214201.1 |
| TCGAAGTTCCATGCGATGTC |
| *Nrf2* | TGACAGTGGCTGGTTGG | XM_003133500.6 |
| TCTCGACTTACTCCAAGGTC |
| *Keap1* | CACGCTGCGATGGAGG | NM_001114671.1 |
| GTGTAGCTAAAGGTGCGGTT |
| *Ho-1* | GAACTTTCAGAAGGGCGAGG | NM_001004027.1 |
| GTAGACCGGGTTCTCCTTGT |
| *IL-1β* | GCTGATGGCCCCAAAGAGAT | NM_001302388.2 |
| TGCCACAATCACAGACACCA |
| *IFN-γ* | GCTTTGCGTGACTTTGTGTT | [NM_213948.1](https://www.ncbi.nlm.nih.gov/nuccore/NM_213948.1) |
| CTCCTTTGAATGGCCTGGTT |
| *TNF-α* | TCCAATGGCAGAGTGGGTATG | NM_214022.1 |
| AGCTGGTTGTCTTTCAGCTTCAC |
| *iNOS* | CCAGGCAATGGAGAGAAACT | NM_001143690.1 |
| CCGAACACAGCATACCTGAA |
| *CD86* | GTTCCTATCCACCAGATGAGT | NM_214222.1 |
| GAAGAGACACCCTGATTGATAC |
| *IL6* | AAATGTCGAGGCTGTGCAGA | NM_214399.1 |
| TCCACTCGTTCTGTGACTGC |
| *IL-12* | TGCAGGGGTGGTGGTAATTC | NM_214013.1 |
| GGCATTAAGGAGCAACCAGC |
| *IL-4* | CTCACCTCCCAACTGATCCC | NM_214123.1 |
| CTCCATGCACGAGTTCTTTCTC |
| *IL-10* | ACCAGATGGGCGACTTGTTG | NM_214041.1 |
| TCTCTGCCTTCGGCATTACG |
| *CD206* | GCCCAGACTGAAGACAGCAT | JN989538.1 |
| GGCATCTACCAGGCAGTTGT |
| *Arg1* | AGACCACAGTATGGCGATTG | XM_005659191.1 |
| AGTGTTGATGTCGGTGTGAG |
| *Tlr4* | TCAGTTCTCACCTTCCTCCTG | GQ503242.1 |
| GTTCATTCCTCACCCAGTCTTC |
| *Myd88* | GATGGTAGCGGTTGTCTCTGAT | AB292176.1 |
| GATGCTGGGGAACTCTTTCTTC |
| *Nfkbiα* | TGTTGGTGTCTTTGGGTGCT | NM_001005150.1 |
| GACATCAGCCCCACACTTCA |
| *NF-κB p65* | TACTGATGAGGACCTGGGGG | NM_001114281.1 |
| ATACACCCTGGTTCAGCAGC |

**Supplementary Table S4.** Primer sequences and accession numbers of genes used in

qRT-PCR(mouse).

| Gene（mouse） | Primer sequences (5′-3′) | Accession numbes |
| --- | --- | --- |
| *Gapdh* | GGCAAATTCAACGGCACAGT | NM_001289726.1 |
| AGATGGTGATGGGCTTCCC |
| *IL-1β* | TTCAGGCAGGCAGTATCACTC | NM_008361.4 |
| GAAGGTCCACGGGAAAGACAC |
| *TNF-α* | GACGTGGAACTGGCAGAAGAG | NM_013693.3 |
| GACGTGGAACTGGCAGAAGAG |
| *IL6* | TAGTCCTTCCTACCCCAATTTCC | NM_031168.2 |
| TTGGTCCTTAGCCACTCCTTC |
| *IL-12* | ATCATCAAACCAGACCCGCC | NM_001303244.1 |
| GAGGAACGCACCTTTCTGGTT |
| *IL-4* | GGTCTCAACCCCCAGCTAGT | NM_021283.2 |
| GCCGATGATCTCTCTCAAGTGAT |
| *IL-10* | AGCCTTATCGGAAATGATCCAGT | NM_010548.2 |
| GGCCTTGTAGACACCTTGGT |
| *IL-1RA* | GCTCATTGCTGGGTACTTACAA | XM_006497727.4 |
| CCAGACTTGGCACAAGACAGG |
| *Tlr4* | ATGGCATGGCTTACACCACC | NM_021297.3 |
| GAGGCCAATTTTGTCTCCACA |
| *Myd88* | TCATGTTCTCCATACCCTTGGT | NM_010851.3 |
| AAACTGCGAGTGGGGTCAG |
| *Nfkbiα* | AGACTCGTTCCTGCACTTGG | NM_010907.2 |
| AGGGGGAGTAGCCTTGGTAG |
| *NF-κB p65* | GGCTACACAGGACCAGGAAC | NM_009045.5 |
| GCCTGGTCCCGTGAAATACA |

**Supplementary Table S5. Details of antibodies.**

| Antibodies | Cat No. | Source | Dilution |
| --- | --- | --- | --- |
| GAPDH | 60004-1 | Proteintech, Chicago, USA | 1:50000 |
| FTH | Bs-8679R | Bioss, Beijing, China | 1:1000 |
| GRP78 | A0241 | Abclonal | 1:1000 |
| p-PERK | AP1501 | Abclonal | 1:1000 |
| PERK | A8196 | Abclonal | 1:1000 |
| p-IRE1α | AP0878 | Abclonal | 1:1000 |
| IRE1α | F0229 | Selleck chemicals ， Houston，USA | 1:500 |
| ATF6 | A0202 | Abclonal | 1:500 |
| ATF4 | A18687 | Abclonal | 1:1000 |
| CHOP | A0221 | Abclonal | 1:5000 |
| MyD88 | AF7524 | Beyotime | 1:1000 |
| p-IκBα | AF2002 | Affinity, Cincinnati, OH, USA | 1:1000 |
| IκBα | 10268-1-AP | Proteintech, Chicago, USA | 1:5000 |
| p-NF-κB P65 | AF2006 | Affinity, Cincinnati, OH, USA | 1:1000 |
| NF-κB P65 | 10745-1-AP | Proteintech, Chicago, USA | 1:2000 |


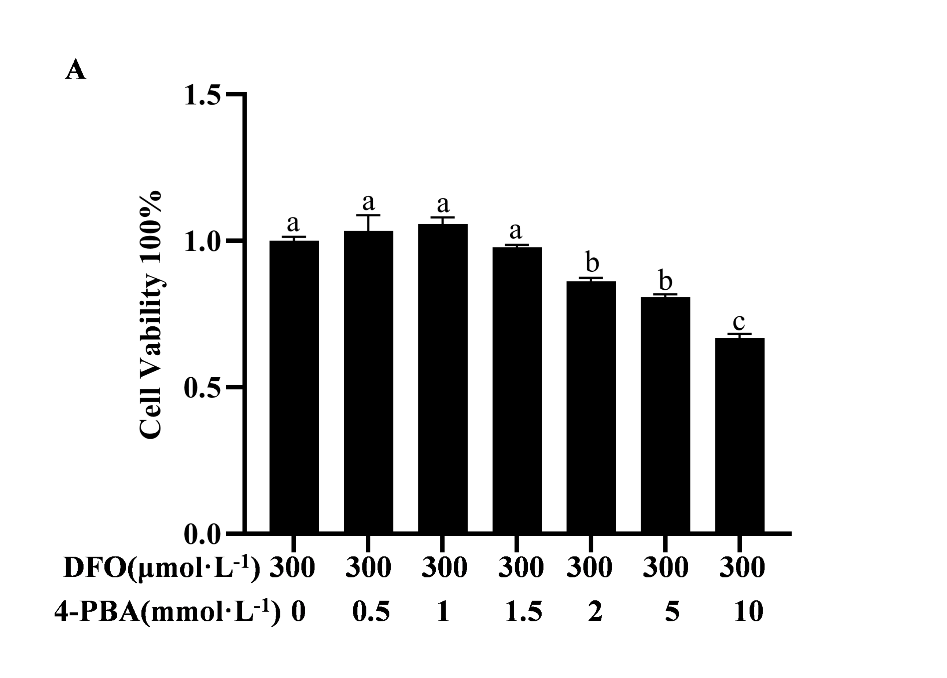


Fig S1A. ERS mediates iron deficiency-induced inflammatory responses.

A.Cell viability was detected by CCK8 assays in AML12 cells treated with 4-PBA and DFO.
